# Supplementary material
Source: Springer Nature journal article supplement (https://www.springermedizin.de/resource/supplementary/12958_2011_967_MOESM3_ESM.pdf/9566466)

(A)

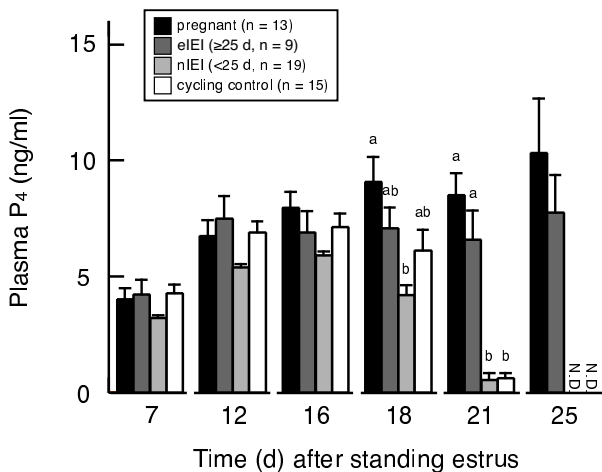

(B)

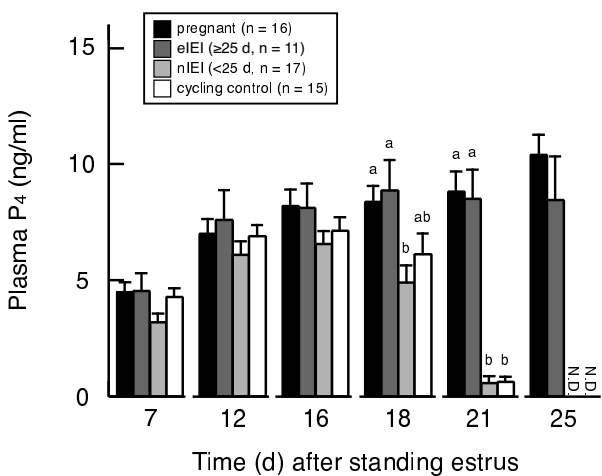

Supplement: MOESM3 [file 9566466]
